# Supplementary material for: The Effect of Interleukin-4 and Dexamethasone on RNA-Seq-Based Transcriptomic Profiling of Human Podocytes: A Potential Role in Minimal Change Nephrotic Syndrome
Source: MDPI journal article supplement (doi:10.3390/jcm10030496), 2021-02-01
Supplement: s1 [file s1]

## Supplementary Materials

**Supplemental Table 1.** 22 genes overlapping with 176 common differentially identified genes (DEGs) and genes listed in the PodNet.

**Supplemental Figure 1.** Heatmap of human podocytes whole-transcriptome sequencing of genes which showed top variance between the IL-4/IL-4+DEX treated and control groups of podocytes.

**Supplemental Figure 2.** Top-listed DEGs which were (A) negatively and (B) positively changed in IL-4 treated-podocytes compared to vehicle-treated controls.

**Supplemental Figure 3.** Top-listed DEGs which were (A) negatively and (B) positively changed in IL-4 treated-podocytes compared to IL-4 plus dexamethasone treated podocytes.

**Supplemental Figure 4.** (A) Heatmap of 22 genes overlapping with 176 common differentially identified genes (DEGs) and genes listed in the PodNet, (B) positive- or negative expression of the 22 DEGs, (C) Protein-protein interaction network for the 22 DEGs.

**Supplemental Figure 5.** Gene expression levels of 12 DEGs in three podocyte groups (A) BMP4, (B) CAMK2B, (C) CDKN1A, (D) PLCE1, (E) RARB, (F) PTGER4, (G) PARD3, (H) PRKCI, (I) WWC1, (J) CASK, (K) TLN2, (L) ARHGAP2.

**Supplemental Table S1. 22 genes overlapping with 176 common differentially identified genes (DEGs) and genes listed in the PodNet**

| ID       | Gene Name                                                       |
|----------|-----------------------------------------------------------------|
| ARHGAP24 | Rho GTPase activating protein 24(ARHGAP24)                      |
| SH2D4A   | SH2 domain containing 4A(SH2D4A)                                |
| SMAD7    | SMAD family member 7(SMAD7)                                     |
| WWC1     | WW and C2 domain containing 1(WWC1)                             |
| ANGPTL2  | angiopoietin like 2(ANGPTL2)                                    |
| BMP4     | bone morphogenetic protein 4(BMP4)                              |
| CAMK2B   | calcium/calmodulin dependent protein kinase II beta(CAMK2B)     |
| CASK     | calcium/calmodulin dependent serine protein kinase(CASK)        |
| CDKN1A   | cyclin dependent kinase inhibitor 1A(CDKN1A)                    |
| KIRREL3  | kin of IRRE like 3 (Drosophila)(KIRREL3)                        |
| NRP1     | neuropilin 1(NRP1)                                              |
| PAK2     | p21 (RAC1) activated kinase 2(PAK2)                             |
| PARD3    | par-3 family cell polarity regulator(PARD3)                     |
| PLCE1    | phospholipase C epsilon 1(PLCE1)                                |
| PKD2     | polycystin 2, transient receptor potential cation channel(PKD2) |
| PTGER4   | prostaglandin E receptor 4(PTGER4)                              |
| PRKCE    | protein kinase C epsilon(PRKCE)                                 |
| PRKCI    | protein kinase C iota(PRKCI)                                    |
| RARB     | retinoic acid receptor beta(RARB)                               |
| SEMA3A   | semaphorin 3A(SEMA3A)                                           |
| SYNPO    | synaptopodin(SYNPO)                                             |
| TLN2     | talin 2(TLN2)                                                   |

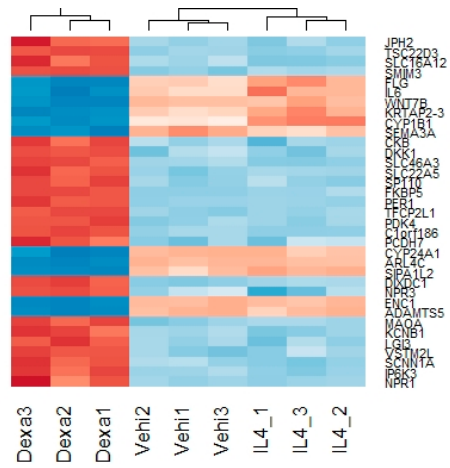

**Supplemental Figure S1. Heatmap of human podocytes whole-transcriptome sequencing of genes which showed top variance between the IL-4/IL-4+DEX treated and control groups of podocytes**

(A)

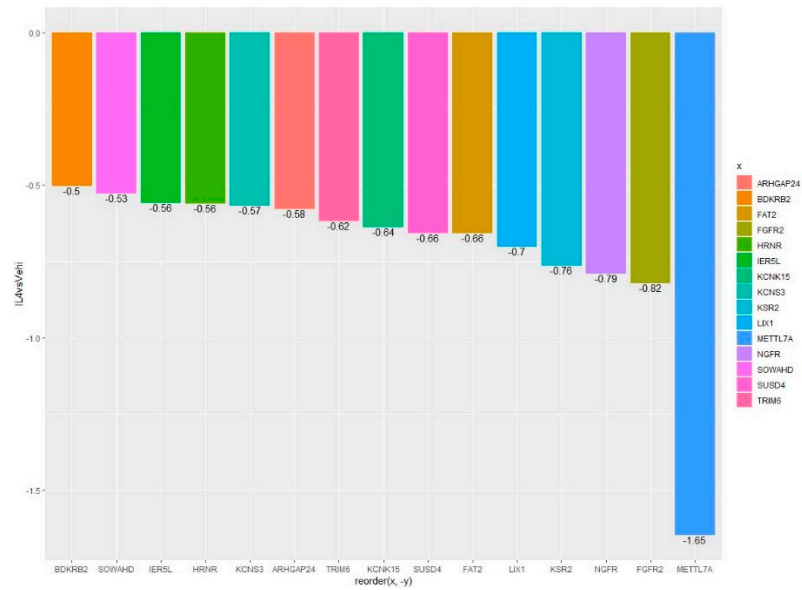

(B)

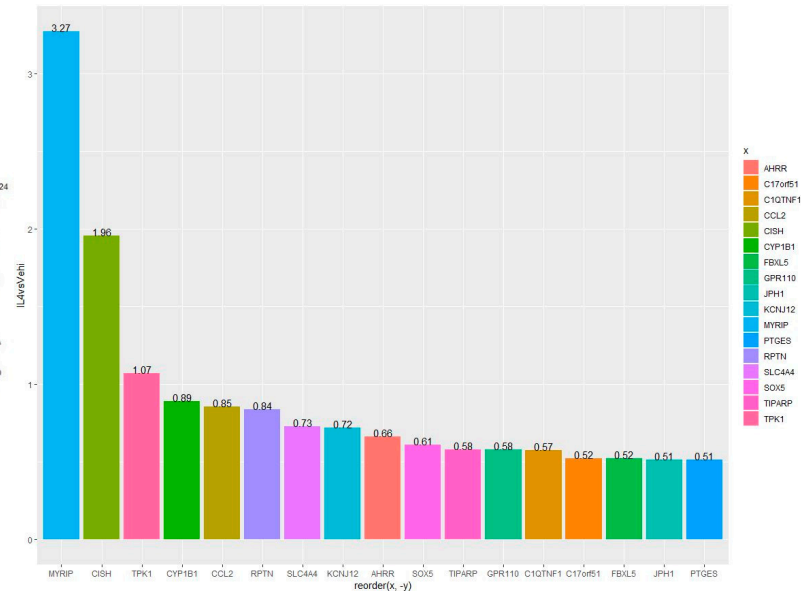

Supplemental Figure S2. Top-listed DEGs which were (A) negatively and (B) positively changed in IL-4 treated-podocytes compared to vehicle-treated controls.

(A)

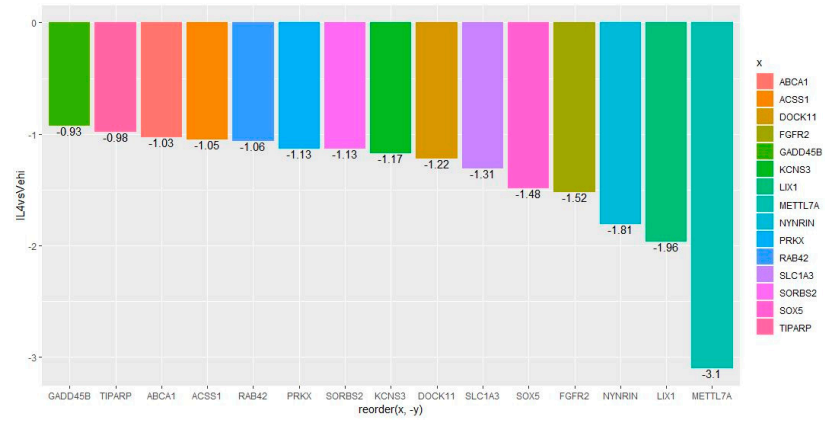

(B)

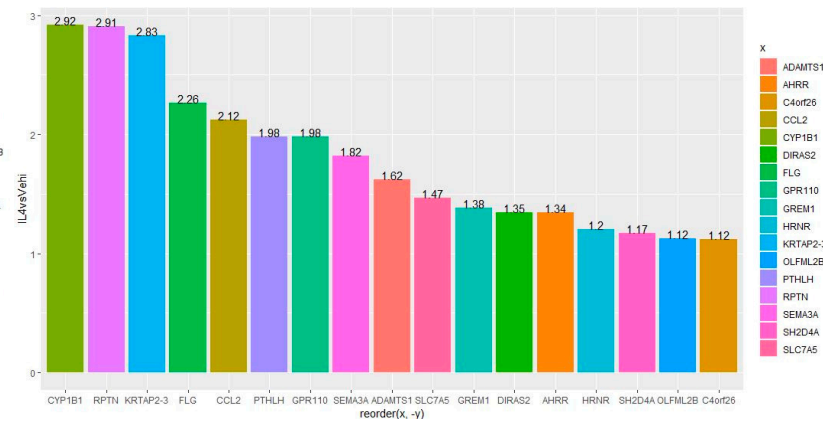

Supplemental Figure S3. Top-listed DEGs which were (A) negatively and (B) positively changed in IL-4 treated-podocytes compared to IL-4 plus dexamethasone treated podocytes.

(A)

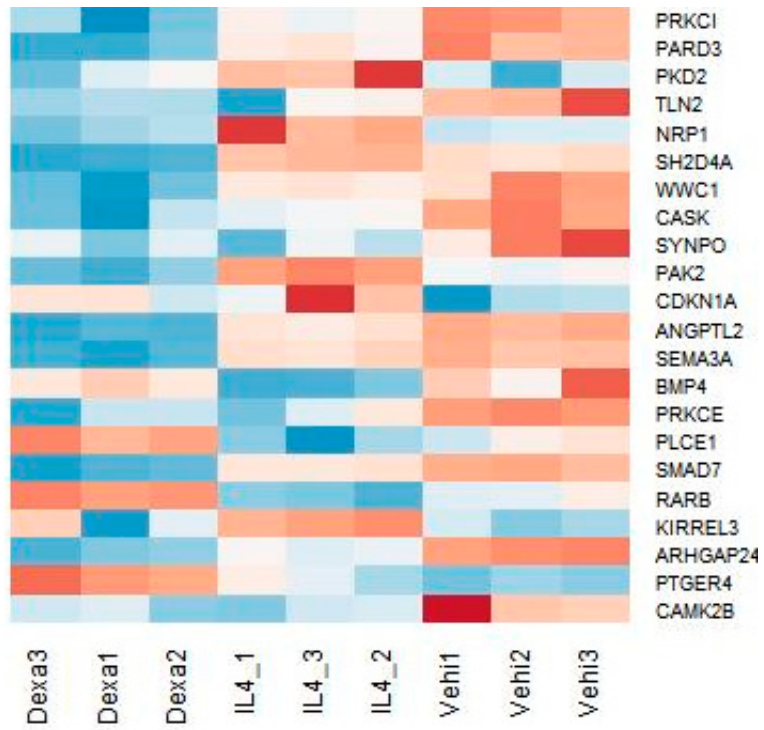

(B)

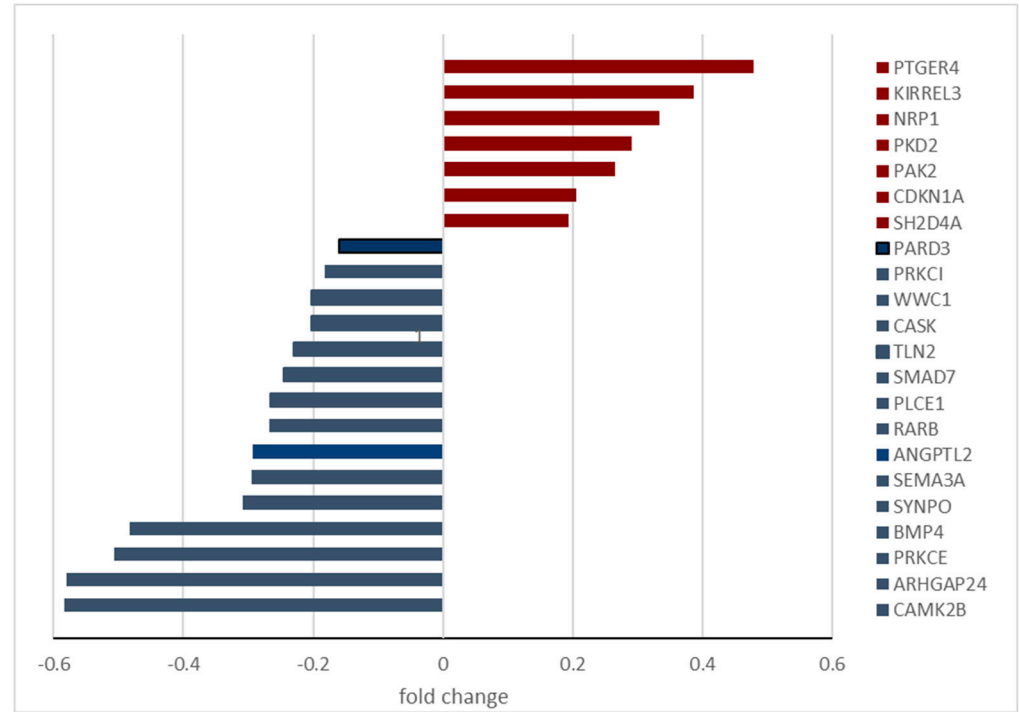

(C)

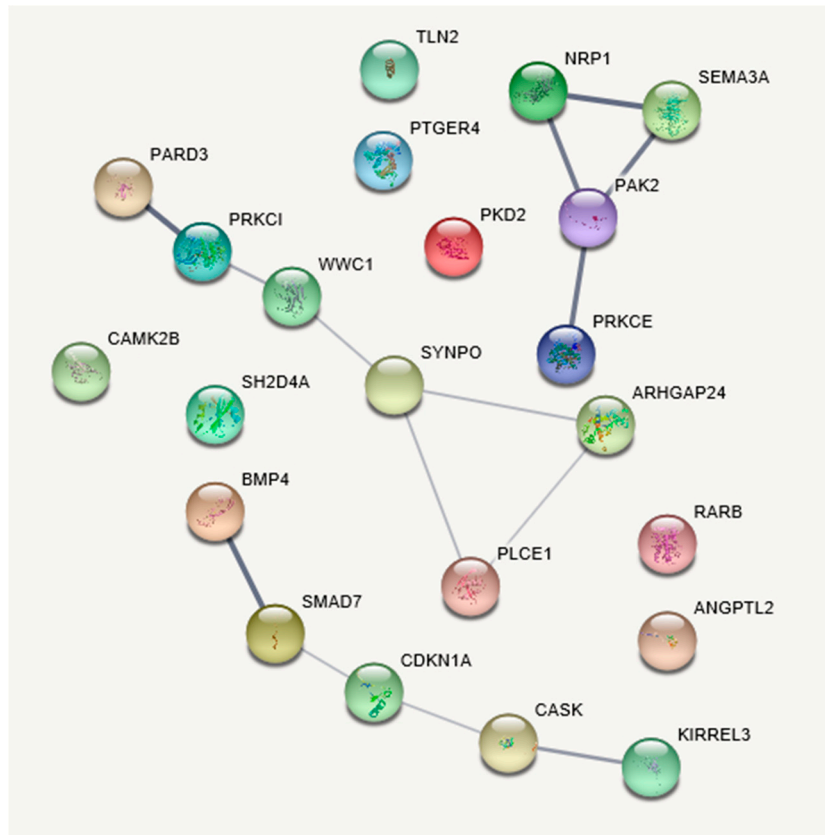

Supplemental Figure S4. (A) Heatmap of 22 genes overlapping with 176 common differentially identified genes (DEGs) and genes listed in the PodNet, (B) positive- or negative expression of the 22 DEGs, (C) Protein-protein interaction network for the 22 DEGs.

**(A)**

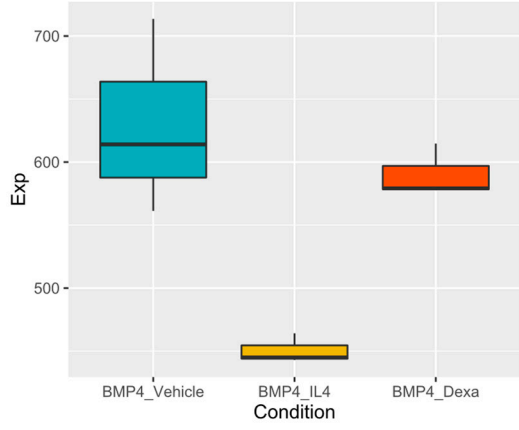

**(B)**

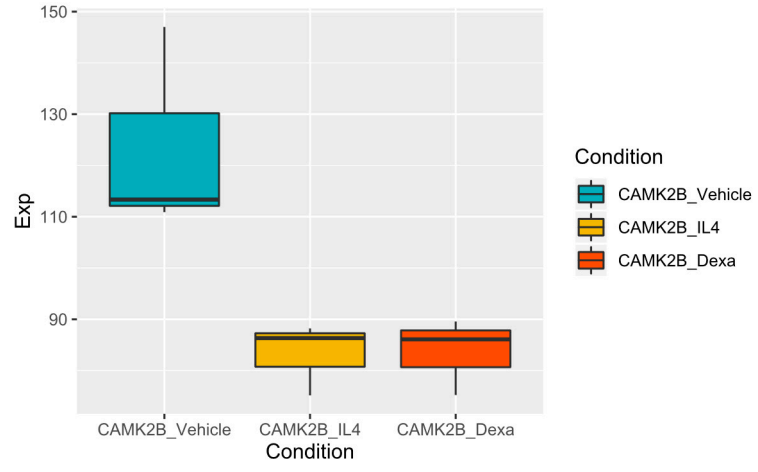

**(C)**

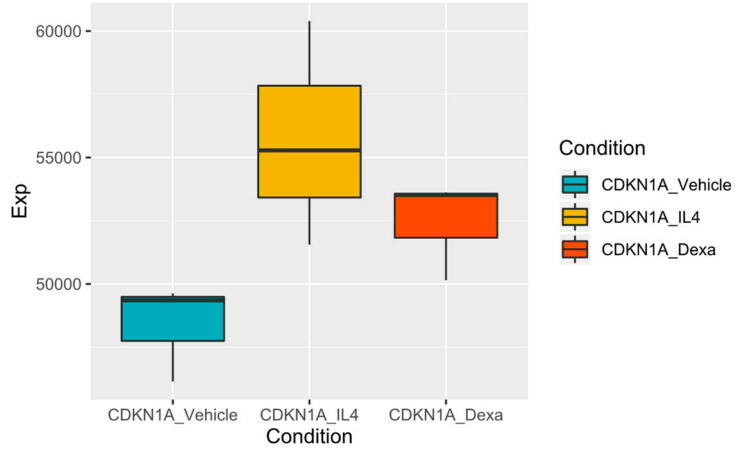

**(D)**

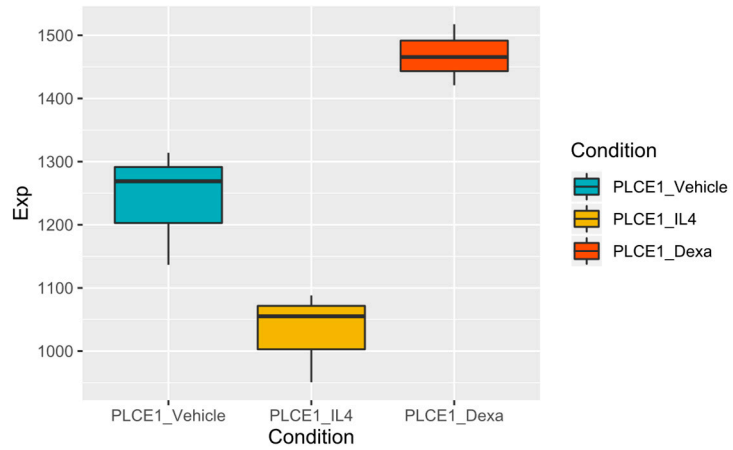



(E)

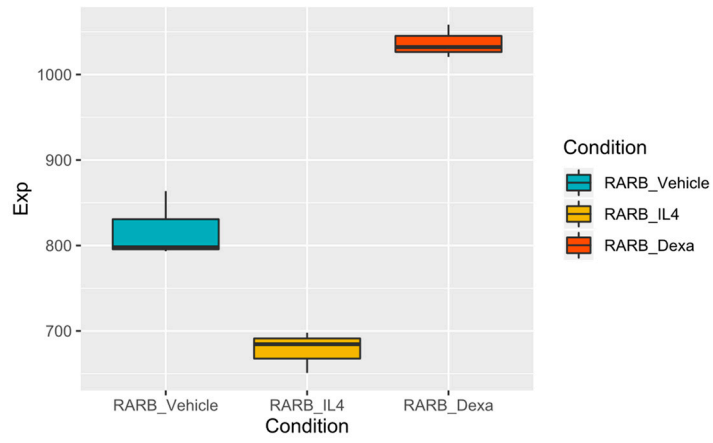

(F)

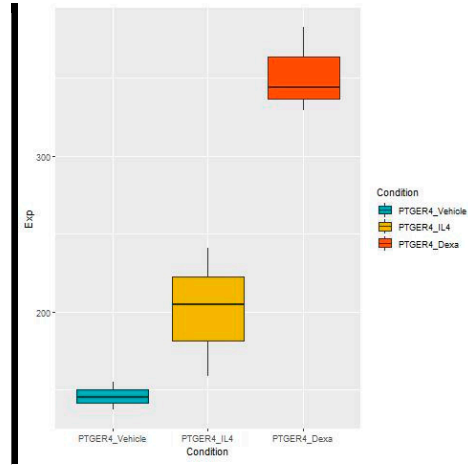

(G)

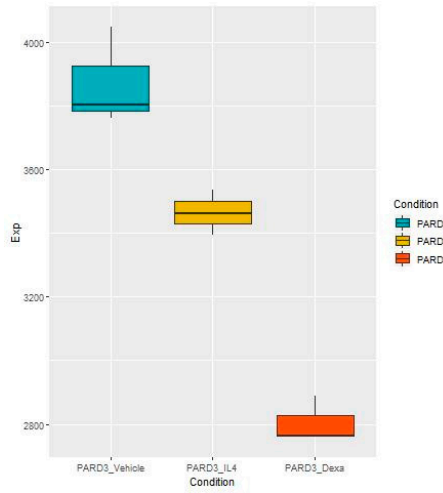

(H)

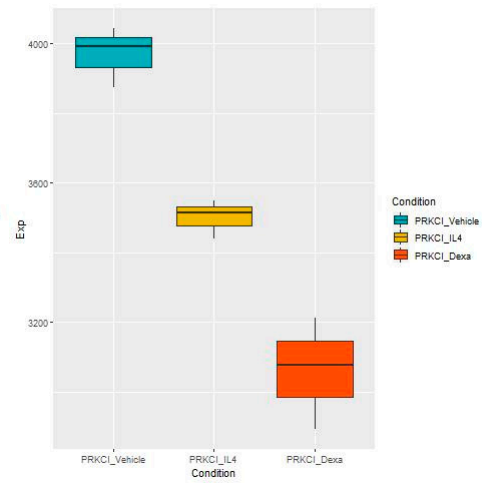

**(I)**

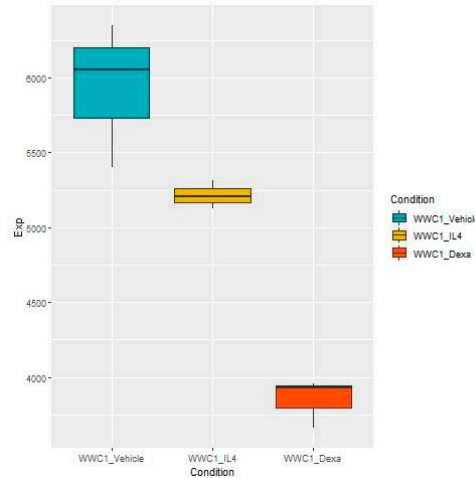

**(J)**

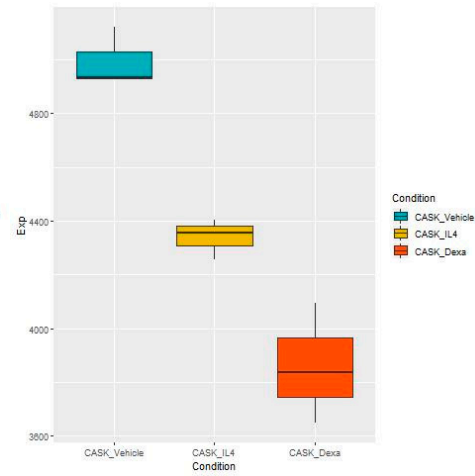

**(K)**

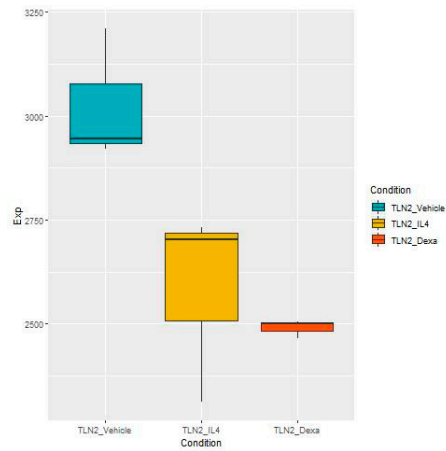

**(L)**

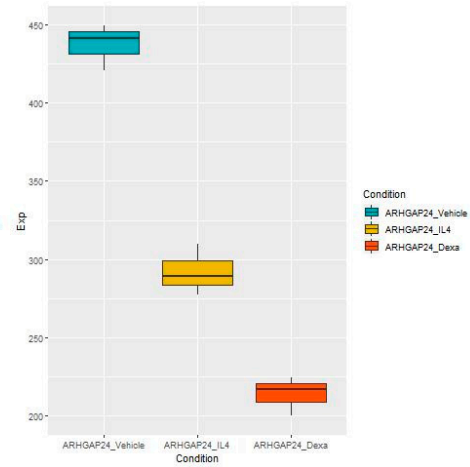

**Supplemental Figure S5. Gene expression levels of 12 DEGs in three podocyte groups. (A) BMP4, (B) CAMK2B, (C) CDKN1A, (D) PLCE1, (E) RARB, (F) PTGER4, (G) PARD3, (H) PRKCI, (I) WWC1, (J) CASK, (K) TLN2, (L) ARHGAP2.**
